# Supplementary material for: Penfluridol Represses Integrin Expression in Breast Cancer through Induction of Reactive Oxygen Species and Downregulation of Sp Transcription Factors
Source: Oxford University Press journal article supplement (doi:10.1158/1535-7163.mct-16-0451), 2016-11-03
Supplement: 15357163mct160451-sup-168941_2_supp_3692285_55l2g6.pdf [file 15357163mct160451-sup-168941_2_supp_3692285_55l2g6.pdf]

### Supplementary Figure S4

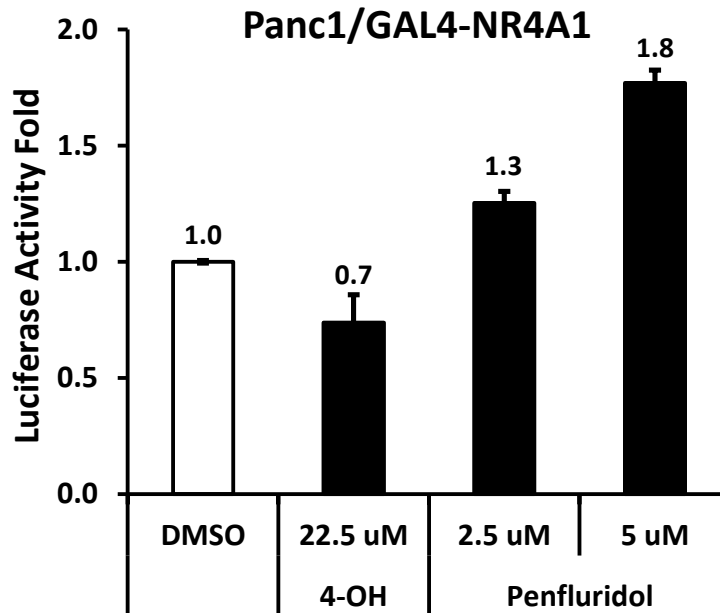

**Supplementary Figure S4.** Penfluridol as an NR4A1 antagonist. Cells were treated with the NR4A1 antagonist DIM-C-pPhOH (4-OH) or penfluridol and transfected with a GAL4-NR4A1 chimera and reporter-luciferase construct (containing GAL4 response elements). Luciferase activity was determined (27). Only DIM-C-pPhOH decreased luciferase activity, characteristic of an NR4A antagonist (26, 27).
